# Supplementary material for: Impacts of tilapia aquaculture on native fish diversity at an ecologically important reservoir
Source: PeerJ journal article supplement (doi:10.7717/peerj.15986), 2023-12-19
Supplement: CPUE.pdf [file CPUE.pdf]

File 2: Script and statistical analyses for the CPUE (individual/hour) of native fish species at both near-cage and far-cage sites of Temengor Reservoir, Perak

| Site      | SPSS | Cpue-effort |
|-----------|------|-------------|
| Near-cage | 1    | 1.833       |
| Near-cage | 1    | 2.042       |
| Near-cage | 1    | 1.208       |
| Near-cage | 1    | 3.750       |
| Near-cage | 1    | 2.458       |
| Near-cage | 1    | 1.167       |
| Near-cage | 1    | 0.375       |
| Near-cage | 1    | 0.250       |
| Near-cage | 1    | 0.917       |
| Near-cage | 1    | 1.583       |
| Near-cage | 1    | 2.000       |
| Near-cage | 1    | 1.542       |
| Near-cage | 1    | 0.792       |
| Near-cage | 1    | 0.583       |
| Near-cage | 1    | 2.917       |
| Far-cage  | 2    | 3.292       |
| Far-cage  | 2    | 4.333       |
| Far-cage  | 2    | 3.375       |
| Far-cage  | 2    | 4.292       |
| Far-cage  | 2    | 4.958       |
| Far-cage  | 2    | 6.292       |
| Far-cage  | 2    | 7.458       |
| Far-cage  | 2    | 3.292       |
| Far-cage  | 2    | 5.708       |

**Tests of Normality**

|      | Kolmogorov-Smirnov <sup>a</sup> |    |                   | Shapiro-Wilk |    |      |
|------|---------------------------------|----|-------------------|--------------|----|------|
|      | Statistic                       | df | Sig.              | Statistic    | df | Sig. |
| CPUE | .144                            | 24 | .200 <sup>*</sup> | .936         | 24 | .130 |

\*. This is a lower bound of the true significance.

a. Lilliefors Significance Correction

**Independent Samples Test**

|      |                             | Levene's Test for Equality of Variances |      | t-test for Equality of Means |        |                 |                 |                       |                                           |           |
|------|-----------------------------|-----------------------------------------|------|------------------------------|--------|-----------------|-----------------|-----------------------|-------------------------------------------|-----------|
|      |                             | F                                       | Sig. | t                            | df     | Sig. (2-tailed) | Mean Difference | Std. Error Difference | 95% Confidence Interval of the Difference |           |
|      |                             |                                         |      |                              |        |                 |                 |                       | Lower                                     | Upper     |
| CPUE | Equal variances assumed     | 2.363                                   | .138 | -6.480                       | 22     | .000            | -3.216667       | .496420               | -4.246179                                 | -2.187155 |
|      | Equal variances not assumed |                                         |      | -5.852                       | 12.312 | .000            | -3.216667       | .549684               | -4.410972                                 | -2.022361 |
