# Supplementary material for: Impacts of tilapia aquaculture on native fish diversity at an ecologically important reservoir
Source: PeerJ journal article supplement (doi:10.7717/peerj.15986), 2023-12-19
Supplement: Diet.pdf [file Diet.pdf]

File 4: Feeding habit (diet) and habitat characteristics of species caught at near-cage and far-cage sites from AIZ, Temengor Reservoir. *Ates* = *Anabas testudineus*, *Cmic* = *Channa micropeltes*, *Cstr* = *Channa striata*, *Capo* = *Cyclocheilichthys apogon*, *Hmac* = *Hampala macrolepidota*, *Hnem* = *Hemibagrus nemurus*, *Lfas* = *Labiobarbus fasciatus*, *Mobt* = *Mystacoleucus obtusirostris*, *Nnot* = *Notopterus notopterus*, *Onil* = *Oreochromis niloticus*, *Ogor* = *Osphronemus goramy*, *Ovit* = *Osteochilus vittatus*, *Omar* = *Oxyeleotris marmorata*, *Oano* = *Oxygaster anomalura*, *Tpec* = *Trichogaster pectoralis*, *Pfas* = *Pristolepis fasciata*, 1 = Yes, 2 = No

| Traits        | Fish species      |             |             |             |             |             |             |             |             |             |             |             |             |             |             |             |   |
|---------------|-------------------|-------------|-------------|-------------|-------------|-------------|-------------|-------------|-------------|-------------|-------------|-------------|-------------|-------------|-------------|-------------|---|
|               | <i>Ates</i>       | <i>Cmic</i> | <i>Cstr</i> | <i>Capo</i> | <i>Hmac</i> | <i>Hnem</i> | <i>Lfas</i> | <i>Mobt</i> | <i>Nnot</i> | <i>Onil</i> | <i>Ogor</i> | <i>Ovit</i> | <i>Omar</i> | <i>Oano</i> | <i>Tpec</i> | <i>Pfas</i> |   |
| Diet          | Plant materials   | 0           | 0           | 0           | 1           | 0           | 1           | 1           | 0           | 1           | <b>1</b>    | 0           | 1           | 0           | 1           | 0           | 1 |
|               | Aquatic weeds     | 1           | 0           | 0           | 0           | 0           | 0           | 0           | 0           | 0           | <b>1</b>    | 1           | 0           | 0           | 0           | 0           | 0 |
|               | Algae             | 0           | 0           | 0           | 1           | 0           | 0           | 1           | 1           | 0           | <b>1</b>    | 0           | 1           | 0           | 0           | 1           | 0 |
|               | Filamentous algae | 0           | 0           | 0           | 1           | 0           | 0           | 1           | 1           | 0           | <b>1</b>    | 1           | 0           | 0           | 1           | 1           | 1 |
|               | Phytoplankton     | 0           | 0           | 0           | 0           | 0           | 0           | 1           | 0           | 0           | <b>1</b>    | 0           | 1           | 0           | 0           | 0           | 0 |
|               | Zooplankton       | 0           | 0           | 0           | 1           | 0           | 0           | 1           | 1           | 0           | <b>0</b>    | 0           | 0           | 0           | 1           | 0           | 0 |
|               | Aquatic insect    | 0           | 0           | 1           | 1           | 1           | 1           | 0           | 1           | 1           | <b>0</b>    | 1           | 0           | 1           | 1           | 1           | 1 |
|               | Dipteran larvae   | 0           | 0           | 1           | 0           | 0           | 0           | 0           | 1           | 0           | <b>0</b>    | 0           | 0           | 0           | 0           | 0           | 1 |
|               | Worms             | 0           | 0           | 1           | 1           | 0           | 0           | 0           | 1           | 0           | <b>0</b>    | 1           | 0           | 0           | 0           | 0           | 0 |
|               | Crustacean        | 0           | 1           | 1           | 1           | 1           | 1           | 1           | 1           | 1           | <b>0</b>    | 0           | 1           | 0           | 0           | 0           | 1 |
|               | Mollusks          | 0           | 0           | 0           | 0           | 1           | 0           | 0           | 0           | 1           | <b>0</b>    | 0           | 0           | 1           | 0           | 0           | 1 |
|               | Fish remains      | 1           | 1           | 1           | 0           | 1           | 1           | 0           | 0           | 1           | <b>1</b>    | 0           | 0           | 1           | 1           | 0           | 0 |
|               | Shrimps           | 1           | 0           | 1           | 0           | 0           | 1           | 0           | 0           | 0           | <b>0</b>    | 1           | 0           | 1           | 0           | 0           | 0 |
|               | Crabs             | 0           | 0           | 0           | 0           | 0           | 0           | 0           | 0           | 0           | <b>0</b>    | 0           | 0           | 1           | 0           | 0           | 0 |
|               | Fruits            | 0           | 0           | 0           | 0           | 0           | 0           | 0           | 0           | 0           | <b>0</b>    | 0           | 0           | 0           | 0           | 0           | 1 |
|               | Seeds             | 0           | 0           | 0           | 0           | 0           | 0           | 0           | 0           | 0           | <b>0</b>    | 0           | 0           | 0           | 0           | 0           | 1 |
|               | Habitat           | Pelagic     | 0           | 0           | 0           | 0           | 0           | 0           | 0           | 0           | <b>0</b>    | 0           | 0           | 0           | 0           | 1           | 0 |
| Benthopelagic |                   | 0           | 1           | 1           | 1           | 1           | 1           | 1           | 0           | <b>1</b>    | 1           | 1           | 0           | 0           | 1           | 0           |   |
| Demersal      |                   | 1           | 0           | 0           | 0           | 0           | 0           | 0           | 0           | 1           | <b>0</b>    | 0           | 0           | 1           | 0           | 0           | 1 |
| Brackish      |                   | 1           | 0           | 1           | 0           | 0           | 1           | 0           | 0           | 1           | <b>1</b>    | 1           | 0           | 1           | 0           | 0           | 0 |
| Potamodromus  |                   | 1           | 1           | 1           | 0           | 1           | 1           | 0           | 0           | 1           | <b>1</b>    | 0           | 1           | 1           | 0           | 1           | 1 |
