# Supplementary material for: Impacts of tilapia aquaculture on native fish diversity at an ecologically important reservoir
Source: PeerJ journal article supplement (doi:10.7717/peerj.15986), 2023-12-19
Supplement: Ecological.pdf [file Ecological.pdf]

File 3: Script and statistical analyses for the ecological indices of native fish at both near-cage and far-cage sites of Temengor Reservoir, Perak

| Site      | Code | Richness | Shannon | Hulbert's | Dominance |
|-----------|------|----------|---------|-----------|-----------|
| Near-cage | 1    | 4.9010   | 1.4405  | 0.8202    | 0.3676    |
| Near-cage | 1    | 4.4590   | 1.2731  | 0.7432    | 0.4791    |
| Near-cage | 1    | 3.3770   | 1.0159  | 0.6611    | 0.5278    |
| Near-cage | 1    | 4.3840   | 1.3252  | 0.7688    | 0.4344    |
| Near-cage | 1    | 3.3680   | 0.9628  | 0.5861    | 0.6144    |
| Near-cage | 1    | 2.8350   | 0.8217  | 0.5637    | 0.6169    |
| Near-cage | 1    | 4.0000   | 1.2149  | 0.7500    | 0.4444    |
| Near-cage | 1    | 2.0000   | 0.6365  | 0.5000    | 0.6667    |
| Near-cage | 1    | 3.6070   | 1.1049  | 0.7035    | 0.4952    |
| Near-cage | 1    | 2.5350   | 0.6450  | 0.4417    | 0.7359    |
| Near-cage | 1    | 3.7700   | 1.1301  | 0.6941    | 0.5057    |
| Near-cage | 1    | 4.0940   | 1.2756  | 0.7657    | 0.4243    |
| Near-cage | 1    | 1.9340   | 0.3239  | 0.2122    | 0.8926    |
| Near-cage | 1    | 2.5380   | 0.6044  | 0.3843    | 0.7811    |
| Near-cage | 1    | 2.6940   | 0.7283  | 0.4915    | 0.6831    |
| Far-cage  | 2    | 3.0290   | 0.8228  | 0.5211    | 0.6840    |
| Far-cage  | 2    | 3.3580   | 0.8919  | 0.5606    | 0.6464    |
| Far-cage  | 2    | 4.1860   | 1.2203  | 0.7270    | 0.4751    |
| Far-cage  | 2    | 4.4570   | 1.2898  | 0.7503    | 0.4672    |
| Far-cage  | 2    | 4.9360   | 1.3977  | 0.7788    | 0.4442    |
| Far-cage  | 2    | 3.4360   | 1.0641  | 0.6741    | 0.5183    |
| Far-cage  | 2    | 4.7910   | 1.4047  | 0.7934    | 0.4097    |
| Far-cage  | 2    | 2.9820   | 0.8629  | 0.5691    | 0.6140    |
| Far-cage  | 2    | 2.2500   | 0.6099  | 0.4443    | 0.7217    |

Tests of Normality

|           |   | Kolmogorov-Smirnov <sup>a</sup> |    |                   | Shapiro-Wilk |    |      |
|-----------|---|---------------------------------|----|-------------------|--------------|----|------|
|           |   | Statistic                       | df | Sig.              | Statistic    | df | Sig. |
| Richness  | 1 | .119                            | 15 | .200 <sup>1</sup> | .962         | 15 | .723 |
|           | 2 | .174                            | 9  | .200 <sup>1</sup> | .944         | 9  | .621 |
| Shannon   | 1 | .131                            | 15 | .200 <sup>1</sup> | .952         | 15 | .561 |
|           | 2 | .172                            | 9  | .200 <sup>1</sup> | .931         | 9  | .488 |
| Hulbert's | 1 | .163                            | 15 | .200 <sup>1</sup> | .924         | 15 | .220 |
|           | 2 | .183                            | 9  | .200 <sup>1</sup> | .919         | 9  | .381 |
| Dominance | 1 | .164                            | 15 | .200 <sup>1</sup> | .950         | 15 | .518 |
|           | 2 | .197                            | 9  | .200 <sup>1</sup> | .916         | 9  | .356 |

\*. This is a lower bound of the true significance.

a. Lilliefors Significance Correction

Independent Samples Test

|           |                             | Levene's Test for Equality of Variances |      | t-test for Equality of Means |        |                 |                 |                       |                                           |          |
|-----------|-----------------------------|-----------------------------------------|------|------------------------------|--------|-----------------|-----------------|-----------------------|-------------------------------------------|----------|
|           |                             | F                                       | Sig. | t                            | df     | Sig. (2-tailed) | Mean Difference | Std. Error Difference | 95% Confidence Interval of the Difference |          |
|           |                             |                                         |      |                              |        |                 |                 |                       | Lower                                     | Upper    |
| Richness  | Equal variances assumed     | .019                                    | .893 | -.898                        | 22     | .379            | -.3474889       | .3871391              | -1.1503662                                | .4553884 |
|           | Equal variances not assumed |                                         |      | -.897                        | 16.928 | .383            | -.3474889       | .3875628              | -1.1654409                                | .4704631 |
| Shannon   | Equal variances assumed     | .325                                    | .575 | -.731                        | 22     | .472            | -.0958244       | .1310180              | -.3675392                                 | .1758903 |
|           | Equal variances not assumed |                                         |      | -.759                        | 18.979 | .457            | -.0958244       | .1262217              | -.3600292                                 | .1683803 |
| Hulbert's | Equal variances assumed     | .954                                    | .339 | -.616                        | 22     | .544            | -.0407822       | .0662158              | -.1781055                                 | .0965410 |
|           | Equal variances not assumed |                                         |      | -.667                        | 20.947 | .512            | -.0407822       | .0611849              | -.1680426                                 | .0864782 |
| Dominance | Equal variances assumed     | .857                                    | .365 | .420                         | 22     | .679            | .0245467        | .0584461              | -.0966631                                 | .1457565 |
|           | Equal variances not assumed |                                         |      | .450                         | 20.558 | .657            | .0245467        | .0545155              | -.0889731                                 | .1380665 |
