# Supplementary material for: Impacts of tilapia aquaculture on native fish diversity at an ecologically important reservoir
Source: PeerJ. 2023 Dec 19;11:e15986. doi: 10.7717/peerj.15986 (PMC10740594; doi:10.7717/peerj.15986)
Supplement: Supplemental Information 1 [file peerj-11-15986-s001.xlsx]

## Sheet: File 1
File 1: Raw data count of fish assemblages at near-cage and far-cage sites of Temengor Reservoir, Perak
Family	Species / Scientific name	English name	Local name	Near-cage	Far-cage
Anabantidae	Anabas testudineus	Climbing Perch	Puyu	0	1
Bagridae	Hemibagrus nemurus	Asian redtail catfish	Baung	2	3
Channidae	Channa micropeltes	Giant Snakehead	Toman	20	22
	Channa striata	Snakehead	Haruan	2	6
Cichlidae	Orechromis niloticus	Tilapia	Tilapia	20	8
Cyprinidae	Cyclocheilichthys apogon	Beardless barb	Temperas	19	36
	Hampala macrolepidota	Hampala barb	Sebarau	263	248
	Labiobarbus fasciatus	Barb	Kawan	3	21
	Mystacoleucus obtusirostus	Minnow	Sia	8	72
	Osteochilus vittatus	Silver sharkminnow	Terbul	120	131
	Oxygaster anomalura	Glass fish	Lalang	76	434
Eleotridae	Oxyeleotris marmorata	Marble goby	Ketutu/Ubi	4	10
Notopteridae	Notopterus notopterus	Bronze featherback	Selat	13	17
Osphronemidae	Osphronemus goramy	Giant gouramy	Kalui	13	15
	Trichogaster pectoralis	Snakeskin Gourami	Sepat	3	8
Pristolepididae	Pristolepis fasciata	Malayan leaffish	Patung	19	16
	Total number of individual			585	1048
	Total number of species present			15	16
	Total number of family present			8	9
	Sampling effort / intensity			15	9
